# Supplementary material
Source: Research Square preprint supplement (doi:10.21203/rs.3.rs-9032243/v1)
Supplement: Supplementary file 1 [file b2314552499b90b52fe0ae76.xlsx]

## Sheet: dataset
THA	SEXE	AGE	SD BIOLINE	CORIS	TL
1	1	32	0	1	1
1	2	25	0	1	1
1	1	43	0	1	1
1	1	43	0	1	1
1	2	21	0	1	1
1	1	23	0	0	1
1	1	28	0	1	1
1	2	37	0	0	1
1	2	29	0	1	1
1	1	53	0	1	1
1	1	23	0	1	1
1	2	49	0	0	1
1	1	13	0	1	0
1	1	40	0	0	1
1	1	23	0	0	1
1	2	25	0	1	1
1	1	36	0	0	1
1	2	43	0	1	0
1	1	28	0	1	1
1	1	55	0	0	0
1	1	22	0	0	1
1	2	53	0	1	1
1	1	41	0	1	1
1	1	34	0	1	1
1	1	59	0	1	1
1	2	13	0	1	1
1	2	18	0	1	0
1	1	22	0	1	0
1	1	35	0	1	1
1	1	45	0	1	1
1	1	13	0	1	0
1	1	51	1	1	1
1	2	26	1	1	1
1	2	22	1	1	1
1	1	37	1	1	1
1	2	33	1	1	1
1	1	20	1	1	1
1	2	19	1	1	1
1	1	25	1	1	1
1	1	53	1	1	1
1	1	31	1	1	0
1	1	41	1	1	1
1	2	51	1	1	1
1	2	26	1	1	0
1	1	28	1	1	0
1	2	32	1	1	1
1	2	25	1	1	1
1	1	47	1	1	1
1	1	53	1	1	1
1	1	33	1	1	1
1	2	37	1	1	1
1	2	45	1	1	1
1	1	29	1	1	1
1	2	32	1	1	1
1	1	22	1	1	1
1	1	22	1	1	1
1	1	39	1	1	1
1	1	19	1	1	1
1	2	33	1	1	1
1	2	49	1	1	1
1	1	29	1	1	1
1	1	18	1	1	1
1	1	36	1	1	1
1	1	37	1	1	1
1	1	21	1	1	0
1	1	53	1	1	1
1	1	14	1	1	1
1	1	23	1	1	1
1	1	35	1	0	1
1	1	53	1	1	0
1	2	28	1	1	1
1	1	64	1	1	1
1	1	35	1	1	1
1	1	33	1	1	0
1	1	42	1	1	1
1	2	50	1	1	1
1	2	27	1	1	1
1	2	27	1	1	1
1	1	38	1	1	1
1	2	13	1	1	1
1	2	25	1	1	1
1	1	41	1	1	1
1	2	19	1	1	1
1	2	26	1	1	1
1	2	40	1	1	1
1	2	38	1	1	1
1	1	32	1	1	1
1	1	41	1	1	1
1	2	45	1	1	1
1	2	41	1	1	1
1	1	32	1	1	1
1	2	32	1	1	1
1	1	32	1	1	1
1	1	57	1	1	1
1	1	40	1	1	1
1	1	65	1	1	1
1	1	26	1	1	1
1	1	33	1	1	1
1	1	39	1	1	1
1	1	14	1	1	1
1	1	28	1	1	1
1	1	41	1	1	1
1	1	48	1	1	1
1	1	44	1	1	0
1	1	33	1	1	1
1	2	32	1	1	1
1	1	32	1	1	1
1	1	32	1	1	1
1	2	13	1	1	1
1	1	27	1	1	1
1	1	24	1	1	1
1	2	14	1	1	1
1	1	40	1	1	1
1	2	36	1	1	1
1	1	25	1	1	1
1	2	63	1	1	1
1	1	28	1	1	1
1	2	50	1	1	0
1	2	19	1	1	1
1	2	17	1	1	0
1	1	24	1	1	1
1	1	39	1	1	1
1	1	32	1	1	1
1	1	41	1	1	1
1	2	53	1	1	1
1	1	59	1	1	1
1	1	15	1	1	1
1	2	31	1	1	0
1	2	19	1	1	1
1	1	65	1	1	1
1	2	20	1	1	1
1	2	16	1	1	1
1	1	39	1	1	1
1	2	22	1	1	1
1	2	41	1	1	1
1	2	24	1	1	1
1	2	56	1	1	1
1	1	31	1	1	1
1	1	12	1	1	1
1	1	53	1	1	1
1	1	47	1	1	1
1	1	19	1	1	1
1	2	50	1	0	1
1	1	27	1	1	1
1	1	18	1	1	1
1	2	33	1	1	1
1	2	28	1	0	1
1	1	31	1	0	1
1	2	27	1	1	1
1	2	49	1	1	1
1	1	26	1	1	1
1	2	27	1	1	0
1	1	22	1	1	1
1	1	26	1	1	1
1	2	15	1	1	1
1	1	33	1	1	1
1	1	35	1	1	1
1	2	40	1	1	1
1	1	37	1	1	1
1	1	35	1	1	1
1	1	30	1	1	1
1	1	31	1	0	1
1	1	26	1	1	1
1	1	23	1	1	0
1	1	32	1	1	1
1	1	53	1	1	1
1	1	37	1	1	1
1	1	37	1	1	1
1	1	30	1	1	1
1	1	40	1	1	1
1	1	26	1	1	1
1	1	29	1	1	1
1	1	30	1	1	1
1	1	50	1	1	1
1	1	22	1	1	1
1	1	43	1	1	1
1	1	23	1	0	0
1	1	57	1	1	1
1	1	20	1	1	1
1	2	60	1	1	1
1	1	40	1	0	1
1	1	31	1	1	1
1	1	29	1	1	1
1	1	42	1	1	1
1	1	28	1	1	1
1	2	49	1	1	1
1	1	36	1	1	1
1	1	18	1	1	1
1	2	20	1	1	1
1	1	35	1	1	1
1	1	36	1	1	1
1	1	57	1	1	1
1	1	22	1	1	1
1	1	15	1	0	1
1	1	27	1	1	1
1	1	42	1	1	1
1	1	19	1	1	1
1	2	50	1	1	1
1	2	19	1	1	1
1	2	32	1	1	0
1	1	23	1	1	0
1	1	52	1	1	1
1	2	36	1	1	1
1	1	26	1	1	1
1	2	33	1	1	1
1	1	23	1	1	1
1	1	42	1	1	1
1	2	17	1	1	1
1	1	20	1	1	1
1	2	33	1	1	0
1	2	23	1	1	0
1	1	18	1	1	1
1	2	52	1	1	1
1	2	28	1	1	1
1	1	23	1	1	1
1	1	41	1	1	1
1	2	53	1	1	1
1	2	25	1	1	1
1	1	23	1	1	1
1	1	41	1	1	1
1	1	28	1	1	1
1	1	18	1	1	1
1	2	27	1	1	1
1	2	56	1	1	0
1	2	21	1	1	1
1	2	32	1	1	1
1	1	38	1	1	1
0	2	22	0	0	0
0	2	21	0	0	1
0	1	20	0	0	0
0	2	34	0	0	0
0	1	27	0	0	0
0	1	44	0	0	0
0	1	61	0	0	0
0	1	14	0	0	0
0	1	16	0	0	0
0	2	16	0	0	0
0	2	23	0	0	0
0	2	16	0	0	0
0	2	14	0	0	0
0	2	14	0	0	0
0	2	40	0	0	0
0	1	18	0	0	0
0	1	16	0	0	0
0	2	16	0	0	1
0	2	16	0	0	0
0	1	27	0	0	0
0	2	48	0	0	0
0	2	18	0	0	0
0	1	18	0	0	0
0	1	76	0	0	0
0	1	16	0	0	0
0	1	78	0	0	0
0	2	25	0	0	0
0	1	58	0	0	0
0	2	34	0	0	0
0	1	59	0	0	0
0	1	50	0	0	0
0	1	56	0	0	0
0	2	29	0	0	0
0	2	34	0	0	0
0	2	17	0	0	0
0	2	20	0	0	0
0	2	22	0	0	0
0	2	29	0	0	0
0	2	16	0	0	0
0	1	58	0	0	0
0	2	12	0	0	0
0	2	57	0	0	0
0	1	51	0	0	0
0	1	38	0	0	0
0	1	39	0	0	0
0	2	40	0	0	0
0	1	26	0	0	0
0	2	17	0	0	0
0	2	20	0	0	0
0	1	63	0	0	0
0	1	52	0	0	0
0	1	28	0	0	0
0	1	21	0	0	0
0	2	37	0	0	0
0	2	60	0	0	0
0	2	41	0	0	0
0	2	21	0	0	0
0	1	23	0	0	0
0	1	28	0	0	0
0	2	50	0	0	0
0	2	50	0	0	0
0	1	50	0	0	0
0	2	37	0	0	0
0	2	46	0	0	0
0	2	57	0	0	0
0	1	51	0	0	0
0	2	49	0	0	0
0	2	61	0	0	0
0	2	60	0	0	0
0	1	27	0	0	0
0	2	29	0	0	0
0	1	41	0	0	0
0	1	32	0	0	0
0	2	41	0	0	0
0	2	29	0	0	0
0	1	66	0	1	0
0	2	37	0	0	0
0	1	56	0	0	0
0	2	56	0	0	0
0	2	33	0	0	0
0	2	26	0	0	0
0	1	19	0	0	0
0	1	58	0	0	0
0	1	45	0	0	0
0	1	46	0	0	0
0	1	26	0	0	1
0	2	37	0	0	0
0	2	35	0	0	0
0	2	65	0	0	0
0	2	40	0	0	0
0	1	39	0	0	0
0	2	30	0	0	0
0	2	48	0	0	0
0	1	33	0	0	0
0	1	60	0	0	0
0	2	45	0	0	0
0	1	65	0	0	0
0	2	17	0	0	0
0	2	30	0	0	0
0	2	29	0	0	0
0	2	23	0	0	0
0	1	53	0	0	0
0	2	21	0	0	0
0	2	49	0	0	0
0	2	30	0	0	0
0	1	14	0	0	1
0	2	30	0	0	0
0	2	40	0	0	0
0	1	31	0	0	0
0	1	60	0	0	0
0	1	38	0	0	0
0	2	42	0	0	0
0	1	12	0	0	0
0	2	16	0	0	0
0	2	55	0	0	0
0	2	29	0	0	0
0	2	45	0	0	0
0	2	46	0	0	0
0	2	60	0	0	0
0	1	46	0	0	0
0	1	40	0	0	0
0	1	60	0	0	0
0	1	22	0	0	0
0	1	61	0	0	1
0	2	50	0	0	0
0	2	60	0	0	0
0	2	38	0	0	0
0	2	27	0	0	0
0	2	40	0	0	0
0	2	27	0	0	0
0	2	43	0	0	0
0	1	19	0	0	0
0	1	29	0	0	0
0	1	20	0	0	0
0	2	26	0	0	0
0	2	30	0	0	0
0	1	54	0	0	0
0	2	42	0	0	0
0	1	16	0	0	0
0	2	23	0	0	0
0	2	60	0	0	0
0	2	52	0	0	0
0	1	60	0	0	0
0	2	46	0	0	0
0	2	51	0	0	0
0	2	20	0	0	0
0	1	56	0	0	0
0	1	51	0	0	0
0	2	63	0	0	0
0	2	50	0	0	0
0	1	19	0	0	0
0	1	45	0	0	0
0	1	29	0	0	1
0	2	36	0	0	0
0	1	73	0	0	0
0	2	65	0	0	0
0	2	56	0	0	0
0	2	36	0	0	0
0	2	38	0	0	0
0	2	45	0	0	0
0	2	43	0	0	0
0	2	33	0	0	0
0	2	71	0	0	0
0	1	37	0	0	0
0	2	22	0	0	0
0	1	25	0	0	0
0	1	35	0	0	0
0	2	28	0	0	0
0	2	48	0	0	0
0	2	67	0	0	0
0	1	67	0	0	0
0	1	58	1	0	0
0	2	62	1	0	0
0	2	42	1	0	0
0	2	17	1	0	1
0	2	16	1	0	0
0	1	16	1	0	0
0	1	15	1	0	0
0	2	16	1	0	0
0	2	39	1	0	0
0	1	74	1	0	0
0	1	37	1	0	0
0	2	15	1	0	0
0	1	29	1	0	0
0	2	19	1	0	0
0	2	40	1	0	0
0	1	13	1	0	0
0	2	38	1	0	0
0	2	42	1	0	0
0	1	73	1	0	0
0	1	36	1	0	0
0	1	65	1	0	0
0	2	54	1	0	0
0	1	48	1	0	0
0	2	35	1	0	0
0	2	40	1	0	0
0	2	46	1	0	0
0	2	52	1	0	0
0	2	28	1	0	0
0	1	45	1	1	0
0	2	35	1	0	0
0	1	53	1	0	0
0	1	36	1	0	0
0	1	27	1	0	0
0	1	13	1	0	0
0	2	35	1	0	0
0	2	42	1	0	0
0	1	49	1	0	0
0	1	69	1	0	0
0	2	32	1	0	0
0	2	42	1	1	0
0	2	50	1	0	0
0	1	46	1	1	0
0	2	41	1	0	0
0	1	70	1	0	0
0	2	38	1	0	0
0	2	58	1	1	0
0	1	30	1	1	0
0	2	25	1	0	0
0	2	67	1	0	0
